# Supplementary material for: Magnetic nanoparticles for magnetic resonance imaging: modulation of macrophage uptake by controlled PEGylation of the surface coating
Source: Royal Society of Chemistry journal article supplement (doi:10.1039/c0jm01526a), 2010-01-01
Supplement: c0jm01526a.pdf [file c0jm01526a.pdf]

## Supporting information

### **Magnetic Nanoparticles for Magnetic Resonance Imaging: Modulation of Macrophage Uptake by Controlled PEGylation of Surface Coating**

**Chao Huang,<sup>1</sup> Koon Gee Neoh,<sup>1\*</sup> Liang Wang,<sup>1</sup> En-Tang Kang,<sup>1</sup> and Borys Shuter<sup>2</sup>**

<sup>1</sup>Department of Chemical and Biomolecular Engineering

<sup>2</sup>Department of Diagnostic Radiology

National University of Singapore

Kent Ridge, Singapore 119260

\* Corresponding authors: [chenkg@nus.edu.sg](mailto:chenkg@nus.edu.sg)

**Figure S1** FTIR spectrum of ~12 nm MNPs

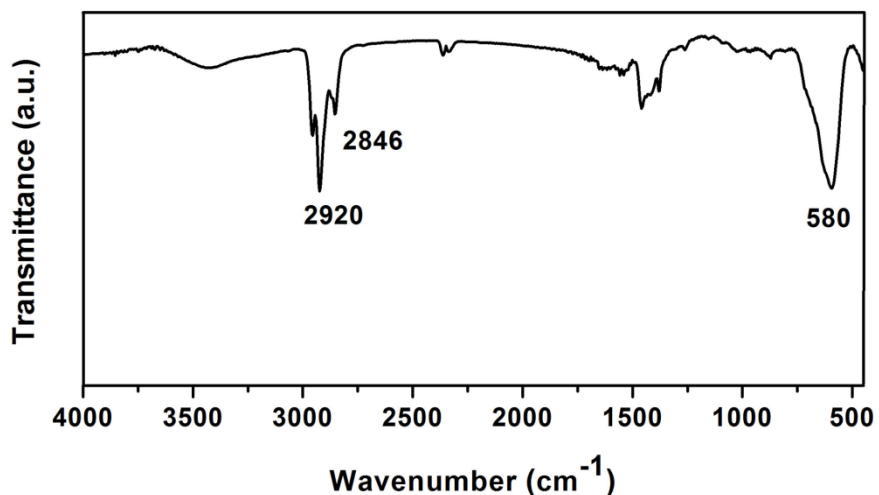

The absorption peak at 580  $\text{cm}^{-1}$  is the characteristic peak of Fe-O in  $\text{Fe}_3\text{O}_4$ . The corresponding characteristic peaks in  $\gamma\text{-Fe}_2\text{O}_3$  at 633  $\text{cm}^{-1}$  and 563  $\text{cm}^{-1}$  are absent<sup>1,2</sup>. The absorption peaks at 2920  $\text{cm}^{-1}$  and 2846  $\text{cm}^{-1}$  are attributed to the asymmetric and symmetric stretch in the methylene groups of oleic acid.

## References

1. X. Q. Zhang, S. W. Gong, Y. Zhang, T. Yang, C. Y. Wang and N. Gu, *Journal of Materials Chemistry*, 2010, **20**, 5110-5116.
2. J. H. Li, R. Y. Hong, H. Z. Li, J. Ding, Y. Zheng and D. G. Wei, *Materials Chemistry and Physics*, 2009, **113**, 140-144.
